# Supplementary material for: Potential of Bacteriocins from Lactobacillus taiwanensis for Producing Bacterial Ghosts as a Next Generation Vaccine
Source: PubMed Central journal article supplement (PMC7404994; doi:10.3390/toxins12070432), 2020-07-01
Supplement: toxins-12-00432-s001.pdf [file toxins-12-00432-s001.pdf]

## Supplementary Materials: Potential of Bacteriocins from *Lactobacillus taiwanensis* for Producing Bacterial Ghosts as A Next Generation Vaccine

Sam Woong Kim, Yeon Jo Ha, Kyu Ho Bang, Seungki Lee, Joo-Hong Yeo, Hee-Sun Yang, Tae-Won Kim, Kyu Pil Lee and Woo Young Bang

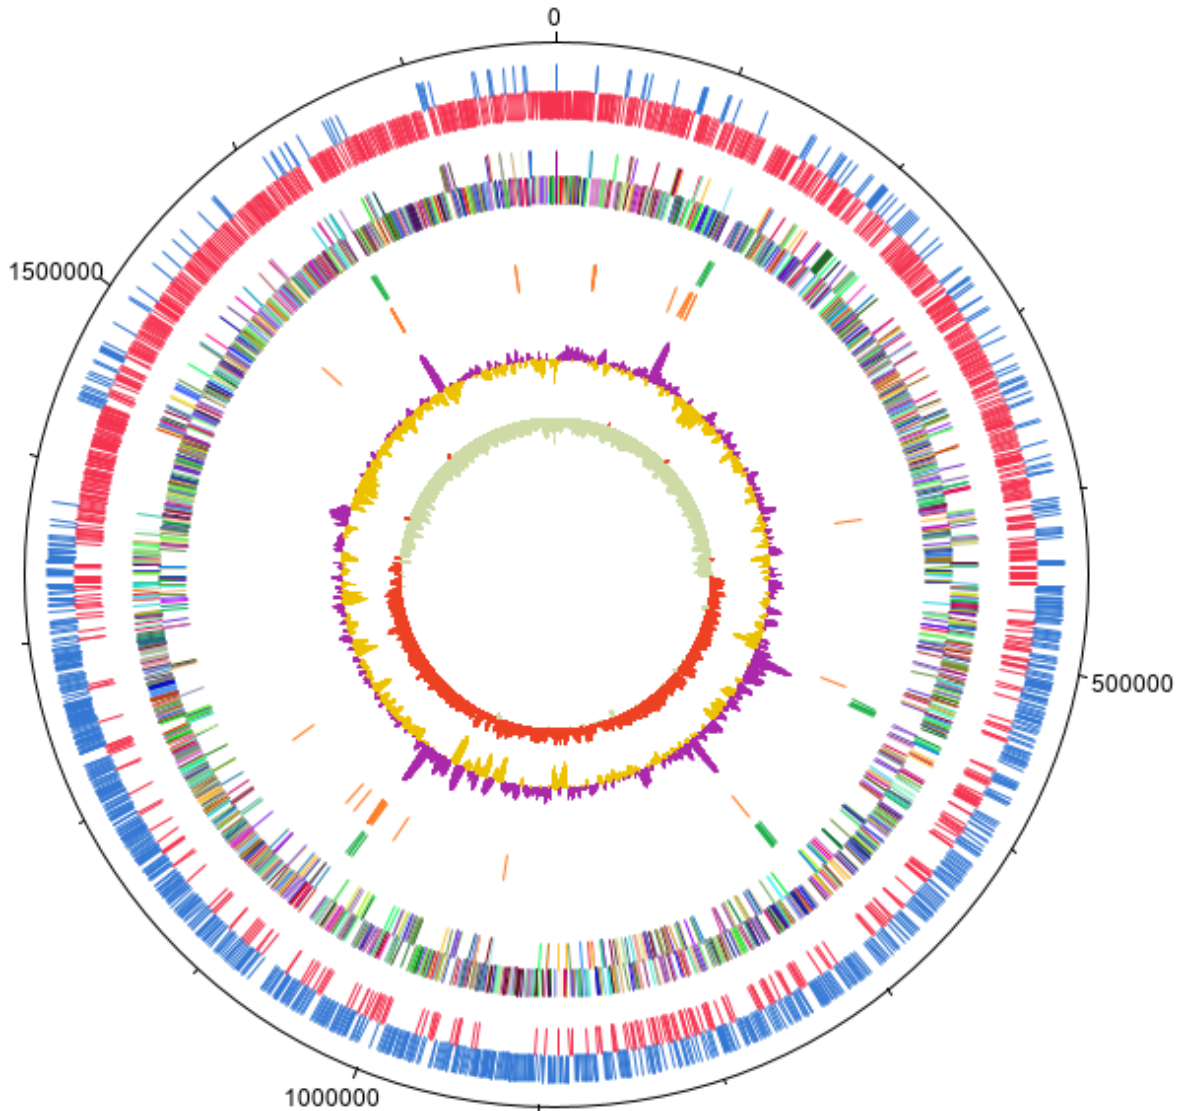

**Figure S1.** Overall features of the *L. taiwanensis* genome. The outer scale indicates the coordinates in base pairs. The open reading frames (ORF) is shown on the first two rings; first ring (blue) is the forward ORF and second ring (red) is the reverse ORF. The third and fourth circle shows the ORF which colored by gene annotation; third ring is forward ORF and fourth ring is reverse ORF. The fifth and sixth circle shows rRNA (green) and tRNA genes (orange). The next circle shows the GC content values. Purple and deep yellow colors indicate positive and negative sign, respectively. The inner-most circle shows GC skew, light green indicating negative values whereas deep orange for positive values. The whole-genome sequence data was deposited as Sequence Read Archive (SRA) data in GenBank (SRA No., SRR12004529; BioProject No., PRJNA639099).

**Phage holin family protein**

| Gene name                                |        | Compared strain                |                                                              |                | Compared gene name         |       |
|------------------------------------------|--------|--------------------------------|--------------------------------------------------------------|----------------|----------------------------|-------|
| Orf0100 phage holin family protein (HFP) |        | [Pediococcus pentosaceus (PP)] |                                                              |                | phage holin family protein |       |
| Score                                    | Expect | Method                         | Identities                                                   | Positives      | Gaps                       | Frame |
| 226 bits (575)                           | 2e-74  | Compositional matrix adjust    | 118/118 (100%)                                               | 118/118 (100%) | 0/118 (0%)                 |       |
|                                          |        |                                | 10 20 30 40 50 60                                            |                |                            |       |
| Or f01000                                |        |                                | MRFWQRVLVNCLLFVALTGFFQSNGNFYVSSIWIALVASLILAILNASIRPILQIISLPI |                |                            |       |
| PP HFP                                   |        |                                | MRFWQRVLVNCLLFVALTGFFQSNGNFYVSSIWIALVASLILAILNASIRPILQIISLPI |                |                            |       |
| Pr im. cons.                             |        |                                | *****                                                        |                |                            |       |
|                                          |        |                                | 70 80 90 100 110                                             |                |                            |       |
| Or f01000                                |        |                                | TLLTLGLFSIVINALMLELTSVFGASNIFYSSFGMTMLISVILSICNTIISNHFTNR    |                |                            |       |
| PP HFP                                   |        |                                | STLLTLGLFSIVINALMLELTVFVGASNIFYSSFGMTMLISVILSICNTIISNHFTNR   |                |                            |       |
| Pr im. cons.                             |        |                                | *****                                                        |                |                            |       |
|                                          |        |                                | TLLTLGLFSIVINALMLELTSVFGASNIFYSSFGMTMLISVILSICNTIISNHFTNR    |                |                            |       |

**Holin 2**

| Gene name        |        | Compared strain               |                                                                  |               | Compared gene name |       |
|------------------|--------|-------------------------------|------------------------------------------------------------------|---------------|--------------------|-------|
| Orf01553 holin 2 |        | Pediococcus acidilactici (PA) |                                                                  |               | holin              |       |
| Score            | Expect | Method                        | Identities                                                       | Positives     | Gaps               | Frame |
| 220 bits (561)   | 3e-72  | Compositional matrix adjust.  | 110/121 (91%)                                                    | 117/121 (96%) | 0/121 (0%)         |       |
|                  |        |                               | 10 20 30 40 50 60                                                |               |                    |       |
| or f01553        |        |                               | MKKISFKNADGSLNGKLIAGISLLIVLVQQLVIFGVKFTGDWSAIVGVINVTILTILG       |               |                    |       |
| PA holin         |        |                               | MKKISFKNADGSLNGKLIAGISLLIVLVQQLVIFGVKFTGDWSAIVGVINVTILTILG       |               |                    |       |
| Pr im. cons.     |        |                               | *****                                                            |               |                    |       |
|                  |        |                               | 70 80 90 100 110 120                                             |               |                    |       |
| Or f01553        |        |                               | MLGVITDVQTVTAPTIVKSDDEESQVEATANKVADEVQAPTSAGAVVNSSKASDTEFTSQASQK |               |                    |       |
| PA holin         |        |                               | MLGVITDVQTVTAPTIVKSDDEESQVEATANKVADEVQAPTSAGAVVNSSAASETESTSQASQK |               |                    |       |
| Pr im. cons.     |        |                               | *****                                                            |               |                    |       |
|                  |        |                               | MLGVITDVQTVTAPTIVKSDDEESQVEATANKVADEVQAPTSAGAVVNSSAS2TE2TSQASQK  |               |                    |       |

**Holin 1**

| Gene name        |        | Compared strain               |                                                                                                    |               | Compared gene name |       |
|------------------|--------|-------------------------------|----------------------------------------------------------------------------------------------------|---------------|--------------------|-------|
| Orf01402 holin 1 |        | Pediococcus acidilactici (PA) |                                                                                                    |               | holin              |       |
| Score            | Expect | Method                        | Identities                                                                                         | Positives     | Gaps               | Frame |
| 250 bits (639)   | 3e-82  | Compositional matrix adjust.  | 116/172 (67%)                                                                                      | 143/172 (83%) | 1/172 (0%)         |       |
|                  |        |                               | 10 20 30 40 50 60 70 80 90                                                                         |               |                    |       |
| Or f01402        |        |                               | MQEINYNTLQMAQSYINIKMIQSHA IYGGVIGAMLAIPAWIERDFPTREHGVMI GILLAVLVI DMLTGSQ LAKRSPVSEKLSHTANI SLIR   |               |                    |       |
| PA holin 1       |        |                               | MQDVVYSALRVAQNYISKMGQSHA IYGGVIGVLA VPAWIESDPT IEHVA VMMA I LVLTLF I DMLTGTALARRSPVAERTSHVGNYS IIR |               |                    |       |
| Pr im. cons.     |        |                               | *****                                                                                              |               |                    |       |
|                  |        |                               | 100 110 120 130 140 150 160 170                                                                    |               |                    |       |
| Or f01402        |        |                               | DFIIVLMCA MAVGLDCV LNTKSF IFAIFTA AF IWQNFY SVLGNLITLGNWKYFPMMFSLIEKIVQDEVRSKQNKYFPTKGEFHEKIK      |               |                    |       |
| PA holin 1       |        |                               | DFIIVAVICVMA IGLDYVCKTRSI IFAVFTA AF IWQNFY SVLGNVITLGNDKHFFPWFNL IKRIVNDEVISKQHKYFP-KGD           |               |                    |       |
| Pr im. cons.     |        |                               | *****                                                                                              |               |                    |       |
|                  |        |                               | AFIWQNFY SVLGNLITLGNW2K2FP2W2F2L I22W2DEV2SKQ2KYFPTKGFHEK I KDF I I V22C2MA2GLD2V22T2S2 IFA2FTA    |               |                    |       |

**Holin 3**

| Gene name        |        | Compared strain                |                                                               |             | Compared gene name |       |
|------------------|--------|--------------------------------|---------------------------------------------------------------|-------------|--------------------|-------|
| Orf01554 holin 3 |        | [Pediococcus pentosaceus (PP)] |                                                               |             | holin              |       |
| Score            | Expect | Method                         | Identities                                                    | Positives   | Gaps               | Frame |
| 169 bits (427)   | 7e-53  | Compositional matrix adjust.   | 86/87 (99%)                                                   | 86/87 (99%) | 0/87 (0%)          |       |
|                  |        |                                | 10 20 30 40 50 60                                             |             |                    |       |
| or f1554         |        |                                | MSQYDDTTKLLMDIQKDVTTTKTKVENIEEKLNQVDDIGNKA EKALAKSIEVEHEIGRIT |             |                    |       |
| PP holin         |        |                                | MSQYDDTTKLLMDIQKDVTTTKTKVENIEEKLNQVDDIGKKA EKALAKSIEVEHEIGRIT |             |                    |       |
| Pr im. cons.     |        |                                | *****                                                         |             |                    |       |
|                  |        |                                | 70 80                                                         |             |                    |       |
| Or f1554         |        |                                | QIQNWVIGVLSGVLVTLVYIAEKFL                                     |             |                    |       |
| PP holin         |        |                                | QIQNWVIGVLSGVLVTLVYIAEKFL                                     |             |                    |       |
| Pr im. cons.     |        |                                | *****                                                         |             |                    |       |
|                  |        |                                | QIQNWVIGVLSGVLVTLVYIAEKFL                                     |             |                    |       |

**Figure S2.** Comparison of homology for holins. Each holin was compared with the corresponding homolog by NCBI blast (<https://blast.ncbi.nlm.nih.gov/>). The symbols \*, : and . indicates the perfect, the strongly similar and the weakly similar alignments, respectively.



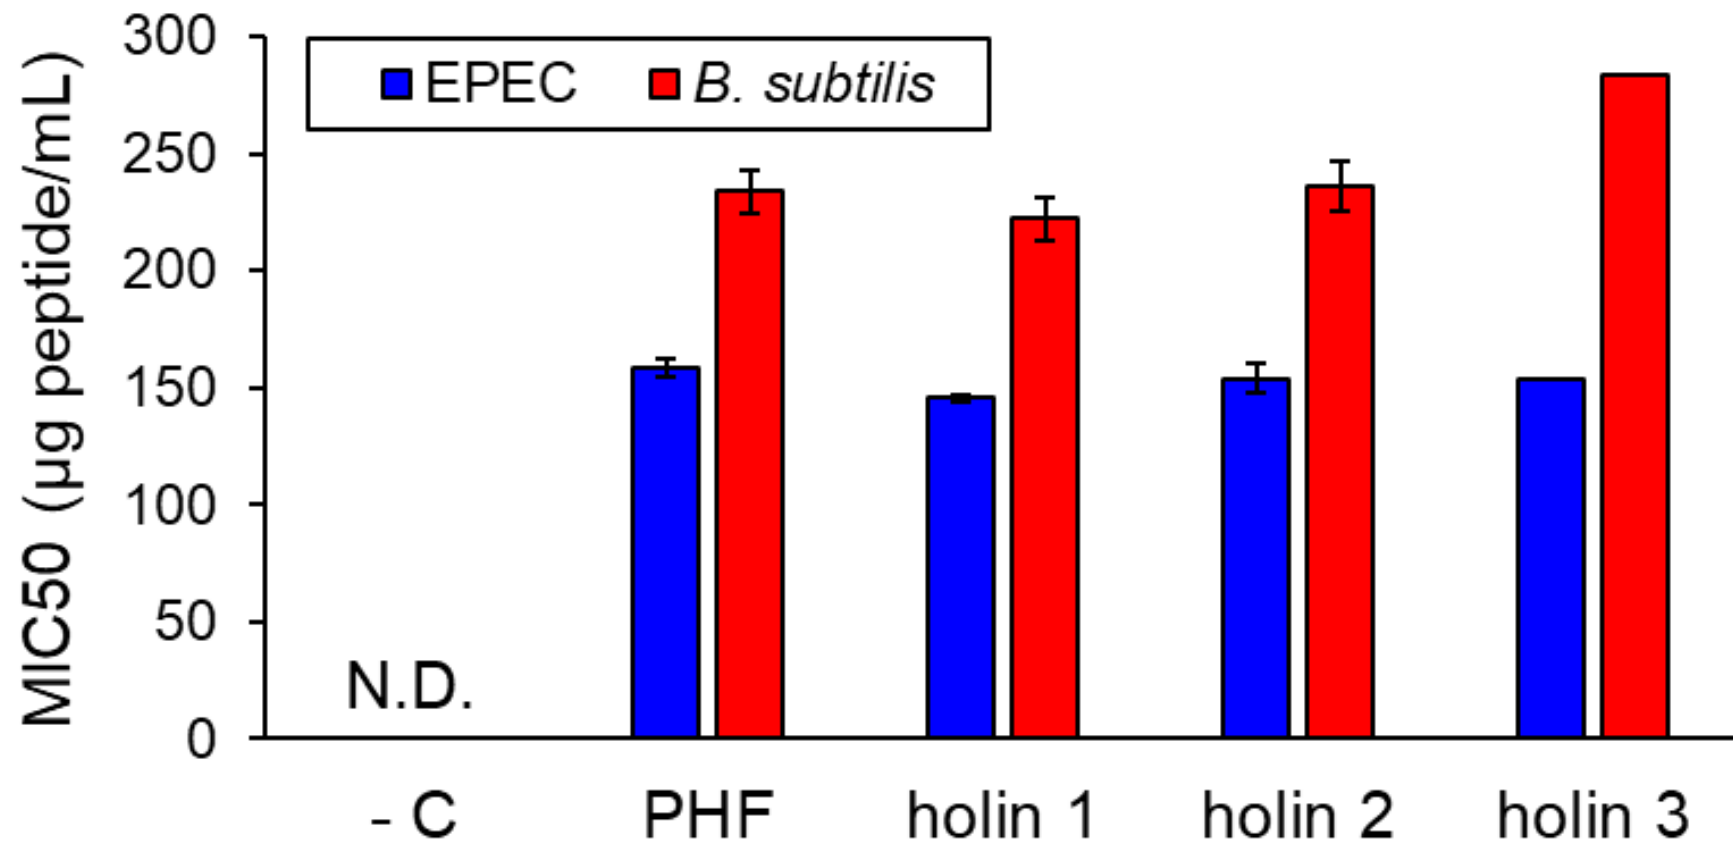

**Figure S4.** Antibacterial activity of holin homologs identified from *L. taiwanensis* genome. the *E. coli* strains efficiently producing the holin homologs were constructed by transforming *E. coli* TOP10 competent cells with the *holin* genes, *PHF* or *holin 1* to *3*, including their own intact promoter, cloned into the pGEM®-T Easy Vector (Promega, Madison, WI, USA) using primers described in Table S2, and their cell-free supernatant was examined for MIC50 against a Gram-negative bacterium (EPEC) (blue bars) and a Gram-positive bacterium (*B. cereus*) (red bars). The cell-free supernatant from the *E. coli* Top10 strain, harboring only the plasmid vector without the *holin* genes, was used as a negative control (- C), whose MIC50s against both EPEC and *B. cereus* were not determined (N.D.).

**Table S1.** Transcriptomic analysis results of *AMPs* from *L. taiwanensis*. *L. taiwanensis* *AMP* transcripts were examined by RNA-sequencing. L-taiwan-ON and L-taiwan-OD05 indicate total RNA samples extracted from *L. taiwanensis* grown during stationary and exponential phases, respectively.

| Test_id               | Sample A    | Sample B      | logFC     | Absolute Fold Change | logCPM    | p Value   | FDR | Description                                                         | Renamed                    |
|-----------------------|-------------|---------------|-----------|----------------------|-----------|-----------|-----|---------------------------------------------------------------------|----------------------------|
| orf00298_contig.1.cir | L-taiwan-ON | L-taiwan-ODO5 | 0.2878146 | 1.2207896            | 6.7504428 | 0.8345538 | 1   | hypothetical protein PEPE_1669 [Pediococcus pentosaceus ATCC 25745] | Taiwanencin 1 (Tan 1)      |
| orf00302_contig.1.cir | L-taiwan-ON | L-taiwan-ODO5 | 1.3665509 | 2.5785337            | 4.3938569 | 0.3378096 | 1   | hypothetical protein PEPE_1673 [Pediococcus pentosaceus ATCC 25745] | Taiwanencin 2 (Tan 2)      |
| orf01000_contig.1.cir | L-taiwan-ON | L-taiwan-ODO5 | 0.1665624 | 1.1223809            | 6.6363689 | 0.904152  | 1   | phage holin family protein                                          | phage holin family protein |
| orf01402_contig.1.cir | L-taiwan-ON | L-taiwan-ODO5 | 2.6437012 | 6.2493284            | 3.9731965 | 0.0796021 | 1   | holin                                                               | holin 1                    |
| orf01552_contig.1.cir | L-taiwan-ON | L-taiwan-ODO5 | -0.324756 | 1.2524524            | 5.8004949 | 0.8153991 | 1   | uncharacterized protein                                             | Taiwanencin 3 (Tan 3)      |
| orf01553_contig.1.cir | L-taiwan-ON | L-taiwan-ODO5 | -2.246791 | 4.7462601            | 7.4881531 | 0.1141369 | 1   | holin                                                               | holin 2                    |
| orf01554_contig.1.cir | L-taiwan-ON | L-taiwan-ODO5 | 0.2101973 | 1.1568464            | 5.2366903 | 0.881427  | 1   | holin                                                               | holin 3                    |

**Table S2.** Oligonucleotides used for cloning of the seven *AMP* genes into pGEM®-T Easy Vector.

| Gene Name      | Forward              |                            | Reverse              |                             |
|----------------|----------------------|----------------------------|----------------------|-----------------------------|
|                | Oligonucleotide Name | Nucleotide Sequence        | Oligonucleotide Name | Nucleotide Sequence         |
| <i>PHF</i>     | orf01000-NdeI        | CATATGTTAGCTTGGTTAATGCCTAG | orf01000-XbaI        | TCTAGATAACTCTAAACCTGGACGTG  |
| <i>Holin 1</i> | orf01402-NdeI        | CATATGTGACGGCAATACAACCAGCG | orf01402-XbaI        | TCTAGACACCTACAATGTACTGGACG  |
| <i>Holin 2</i> | orf01553-NdeI        | CATATGGAATGCCAATTGCGTAATCC | orf01553-XbaI        | TCTAGACCAAAAAGGACGTGACCACCA |
| <i>Holin 3</i> | orf01554-NdeI        | CATATGCGCCAACAATGGCTGACCAG | orf01554-XbaI        | TCTAGATATCGCTGGGTACGTCAGCC  |
